# Supplementary material for: Uptake and Metabolic Conversion of Exogenous Phosphatidylcholines Depending on Their Acyl Chain Structure in Arabidopsis thaliana
Source: MDPI journal article supplement (doi:10.3390/ijms25010089), 2023-12-20
Supplement: s1 [file s1]

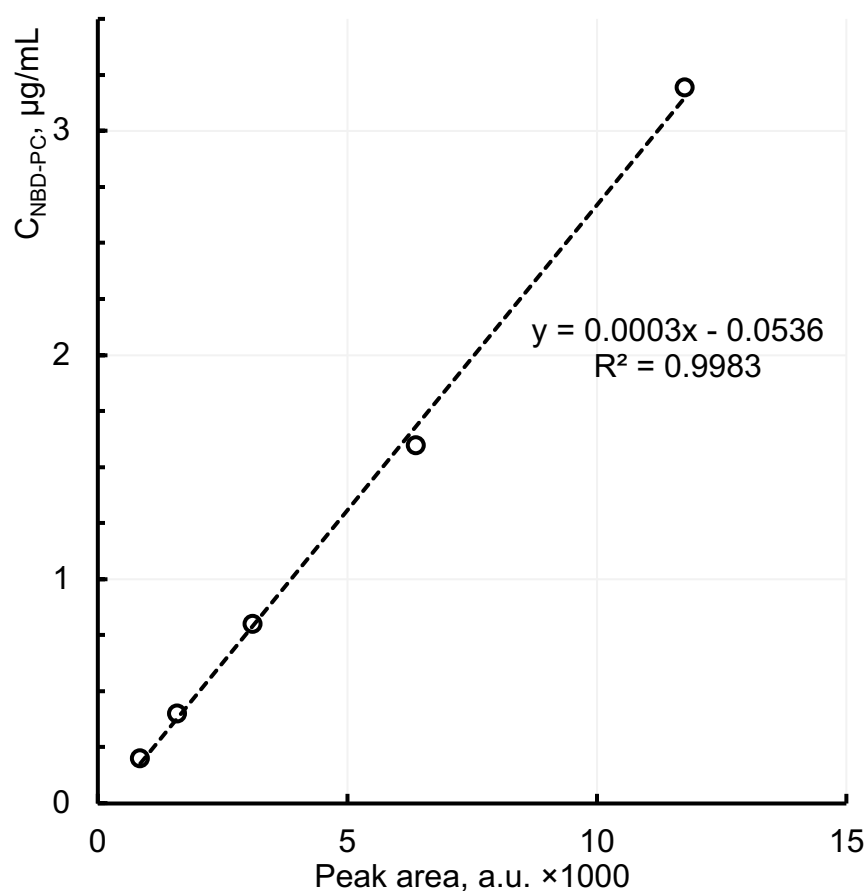

**Figure S1.** Calibration curve for NBD-PC measurement using HPLC-FID. Peak area from chromatogram was derived using LicArt WSV Software 00.01.01.08 (Labconcept, Russia). NBD-PC was diluted from 10 mM stock solution in DMSO to a final concentrations of 0.25, 0.5, 1.0, 2.0 and 4.0  $\mu\text{M}$  in methanol (0.199, 0.399, 0.798, 1.596 and 3.192  $\mu\text{g/mL}$ , respectively). Molar concentration was converted to mass content given that molar mass of 18:1-06:0 NBD PC equals to 797.434 g/Mol. Linear regression equation and corresponding coefficient of determination are displayed below the trend line.
