# Supplementary material for: Uptake and Metabolic Conversion of Exogenous Phosphatidylcholines Depending on Their Acyl Chain Structure in Arabidopsis thaliana
Source: Int J Mol Sci. 2023 Dec 20;25(1):89. doi: 10.3390/ijms25010089 (PMC10778594; doi:10.3390/ijms25010089)
Supplement: Supplementary file 1 [file ijms-25-00089-s001.zip › Table S1 MRM profiling.xlsx]

## Sheet: Parameters of MRM
Table S1. Parameters of MRM profiling
Molecule List Name	Precursor Name	Precursor m/z	Precursor Adduct	Precursor Charge	Product m/z	Product Charge	CE	Note
PC	13:0_13:0	694.466	[M+FA]	-1	213.185	-1	-40	Standard
PC	14:0_14:0	722.498	[M+FA]	-1	227.1	-1	-40	Standard
PC	19:0_19:0	862.654	[M+FA]	-1	297.279	-1	-40
PC	12:0cp_12:0cp	718.46	[M+FA]	-1	225.1	-1	-40
PC	12:0cp_16:0	748.513	[M+FA]	-1	225.1	-1	-40
PC	12:0cp_16:0	748.513	[M+FA]	-1	255.232	-1	-40
PC	14:0_16:0	750.529	[M+FA]	-1	227.1	-1	-40
PC	14:0_16:0	750.529	[M+FA]	-1	255.232	-1	-40
PC	16:3_16:3	766.466	[M+FA]	-1	249.19	-1	-40
PC	16:1_16:3	770.498	[M+FA]	-1	253.217	-1	-40
PC	16:1_16:3	770.498	[M+FA]	-1	249.19	-1	-40
PC	14:0_18:3	772.513	[M+FA]	-1	227.201	-1	-40
PC	14:0_18:3	772.513	[M+FA]	-1	277.217	-1	-40
PC	12:0cp_18:2	772.513	[M+FA]	-1	225.1	-1	-40
PC	12:0cp_18:2	772.513	[M+FA]	-1	279.232	-1	-40
PC	12:0cp_18:1	774.529	[M+FA]	-1	225.1	-1	-40
PC	12:0cp_18:1	774.529	[M+FA]	-1	281.248	-1	-40
PC	14:0_18:2	774.529	[M+FA]	-1	279.232	-1	-40
PC	14:0_18:2	774.529	[M+FA]	-1	227.2	-1	-40
PC	14:0_18:1	776.544	[M+FA]	-1	281.248	-1	-40
PC	14:0_18:1	776.544	[M+FA]	-1	227.2	-1	-40
PC	16:0_16:3	772.513	[M+FA]	-1	255.232	-1	-40
PC	16:0_16:3	772.513	[M+FA]	-1	249.19	-1	-40
PC	16:0_16:2	774.529	[M+FA]	-1	255.232	-1	-40
PC	16:0_16:2	774.529	[M+FA]	-1	251.204	-1	-40
PC	16:1_16:1	774.529	[M+FA]	-1	253.217	-1	-40
PC	16:0_16:1	776.544	[M+FA]	-1	255.232	-1	-40
PC	16:0_16:1	776.544	[M+FA]	-1	253.218	-1	-40
PC	16:0_16:0	778.56	[M+FA]	-1	255.232	-1	-40
PC	15:1_18:2	786.529	[M+FA]	-1	279.232	-1	-40
PC	15:1_18:2	786.529	[M+FA]	-1	239.201	-1	-40
PC	15:0_18:3	786.529	[M+FA]	-1	277.217	-1	-40
PC	15:0_18:3	786.529	[M+FA]	-1	24:1.2168	-1	-40
PC	15:0_18:2	788.554	[M+FA]	-1	24:1.2168	-1	-40
PC	15:0_18:2	788.554	[M+FA]	-1	279.232	-1	-40
PC	15:1_18:1	788.554	[M+FA]	-1	239.23	-1	-40
PC	15:1_18:1	788.554	[M+FA]	-1	281.248	-1	-40
PC	15:0_18:1	790.529	[M+FA]	-1	281.248	-1	-40
PC	15:0_18:1	790.529	[M+FA]	-1	24:1.2168	-1	-40
PC	16:3_18:4	792.482	[M+FA]	-1	249.19	-1	-40
PC	16:3_18:4	792.482	[M+FA]	-1	275.2	-1	-40
PC	16:3_18:3	794.498	[M+FA]	-1	249.19	-1	-40
PC	16:3_18:3	794.498	[M+FA]	-1	277.217	-1	-40
PC	16:3_18:2	796.513	[M+FA]	-1	249.19	-1	-40
PC	16:3_18:2	796.513	[M+FA]	-1	279.232	-1	-40
PC	18:1_16:3	798.529	[M+FA]	-1	281.248	-1	-40
PC	18:1_16:3	798.529	[M+FA]	-1	249.19	-1	-40
PC	16:1_18:3	798.529	[M+FA]	-1	253.217	-1	-40
PC	16:1_18:3	798.529	[M+FA]	-1	277.217	-1	-40
PC	16:2_18:1	800.544	[M+FA]	-1	251.201	-1	-40
PC	16:2_18:1	800.544	[M+FA]	-1	281.248	-1	-40
PC	16:3_18:0	800.545	[M+FA]	-1	249.19	-1	-40
PC	16:3_18:0	800.545	[M+FA]	-1	283.264	-1	-40
PC	16:0_18:3	800.544	[M+FA]	-1	277.217	-1	-40
PC	16:0_18:3	800.544	[M+FA]	-1	255.232	-1	-40
PC	16:1_18:2	800.544	[M+FA]	-1	253.217	-1	-40
PC	16:1_18:2	800.544	[M+FA]	-1	279.232	-1	-40
PC	16:0_18:2	802.56	[M+FA]	-1	279.232	-1	-40
PC	16:0_18:2	802.56	[M+FA]	-1	255.232	-1	-40
PC	16:0_18:1	804.575	[M+FA]	-1	281.248	-1	-40
PC	16:0_18:1	804.575	[M+FA]	-1	255.232	-1	-40
PC	17:0_18:2	816.575	[M+FA]	-1	279.232	-1	-40
PC	17:0_18:2	816.575	[M+FA]	-1	269.248	-1	-40
PC	17:1_18:1	816.575	[M+FA]	-1	281.248	-1	-40
PC	17:1_18:1	816.575	[M+FA]	-1	267.248	-1	-40
PC	17:0_18:1	818.591	[M+FA]	-1	269.248	-1	-40
PC	17:0_18:1	818.591	[M+FA]	-1	281.248	-1	-40
PC	18:3_18:3	822.53	[M+FA]	-1	277.217	-1	-40
PC	18:2_18:3	824.544	[M+FA]	-1	277.217	-1	-40
PC	18:2_18:3	824.544	[M+FA]	-1	279.232	-1	-40
PC	18:1_18:3	826.56	[M+FA]	-1	277.217	-1	-40
PC	18:1_18:3	826.56	[M+FA]	-1	281.248	-1	-40
PC	18:2_18:2	826.56	[M+FA]	-1	279.232	-1	-40
PC	20:4_16:0	826.56	[M+FA]	-1	255.232	-1	-40
PC	20:4_16:0	826.56	[M+FA]	-1	303.232	-1	-40
PC	18:0_18:3	828.575	[M+FA]	-1	277.217	-1	-40
PC	18:0_18:3	828.575	[M+FA]	-1	283.248	-1	-40
PC	18:1_18:2	828.575	[M+FA]	-1	279.232	-1	-40
PC	18:1_18:2	828.575	[M+FA]	-1	281.248	-1	-40
PC	18:0_18:2	830.591	[M+FA]	-1	279.232	-1	-40
PC	18:0_18:2	830.591	[M+FA]	-1	283.264	-1	-40
PC	18:1_18:1	830.591	[M+FA]	-1	281.248	-1	-40
PC	18:0_18:1	832.607	[M+FA]	-1	281.248	-1	-40
PC	18:0_18:1	832.607	[M+FA]	-1	283.264	-1	-40
PC	16:0_20:1	832.607	[M+FA]	-1	255.232	-1	-40
PC	16:0_20:1	832.607	[M+FA]	-1	309.279	-1	-40
PC	17:1_20:4	838.56	[M+FA]	-1	267.248	-1	-40
PC	17:1_20:4	838.56	[M+FA]	-1	303.232	-1	-40
PC	17:0_20:4	840.575	[M+FA]	-1	269.248	-1	-40
PC	17:0_20:4	840.575	[M+FA]	-1	303.232	-1	-40
PC	17:1_20:3	840.575	[M+FA]	-1	267.248	-1	-40
PC	17:1_20:3	840.575	[M+FA]	-1	305.248	-1	-40
PC	17:0_20:3	842.591	[M+FA]	-1	269.248	-1	-40
PC	17:0_20:3	842.591	[M+FA]	-1	305.248	-1	-40
PC	19:0_18:2	844.607	[M+FA]	-1	297.279	-1	-40
PC	19:0_18:2	844.607	[M+FA]	-1	279.232	-1	-40
PC	18:2_20:4	850.56	[M+FA]	-1	279.232	-1	-40
PC	18:2_20:4	850.56	[M+FA]	-1	303.232	-1	-40
PC	18:2_20:3	852.575	[M+FA]	-1	279.232	-1	-40
PC	18:2_20:3	852.575	[M+FA]	-1	305.248	-1	-40
PC	18:1_20:4	852.575	[M+FA]	-1	303.232	-1	-40
PC	18:1_20:4	852.575	[M+FA]	-1	281.248	-1	-40
PC	18:2_20:2	854.591	[M+FA]	-1	307.264	-1	-40
PC	18:2_20:2	854.591	[M+FA]	-1	279.232	-1	-40
PC	18:2_20:1	856.607	[M+FA]	-1	279.232	-1	-40
PC	18:2_20:1	856.607	[M+FA]	-1	309.279	-1	-40
PC	18:0_20:2	858.622:33	[M+FA]	-1	283.2	-1	-40
PC	18:0_20:2	858.622:33	[M+FA]	-1	307.264	-1	-40
PC	18:2_20:0	858.622:33	[M+FA]	-1	311.295	-1	-40
PC	18:2_20:0	858.622:33	[M+FA]	-1	279.232	-1	-40
PC	18:2_22:6	847.56	[M+FA]	-1	279.232	-1	-40
PC	18:2_22:6	847.56	[M+FA]	-1	329.248	-1	-40
PC	18:1_22:6	876.575	[M+FA]	-1	281.248	-1	-40
PC	18:1_22:6	876.575	[M+FA]	-1	329.248	-1	-40
PC	20:0_20:2	886.654	[M+FA]	-1	311.295	-1	-40
PC	20:0_20:2	886.654	[M+FA]	-1	307.264	-1	-40
PC	20:1_20:1	886.654	[M+FA]	-1	309.279	-1	-40
PC	20:1_22:1	912.669	[M+FA]	-1	309.279	-1	-40
PC	20:1_22:1	912.669	[M+FA]	-1	335.281	-1	-40
PC	20:2_22:1	912.669	[M+FA]	-1	307.264	-1	-40
PC	20:2_22:1	912.669	[M+FA]	-1	337.311	-1	-40
PC	24:0_18:2	914.685	[M+FA]	-1	367.358	-1	-40
PC	24:0_18:2	914.685	[M+FA]	-1	279.232	-1	-40
PE	Cy14:0	630.42	[M-H]-	-1	225.185	-1	-20
PE	14:0_14:0	634.445	[M-H]-	-1	227.1	-1	-20
PE	12:0cp_16:0	660.414	[M-H]-	-1	255.23	-1	-20
PE	12:0cp_16:0	660.414	[M-H]-	-1	225.1	-1	-20
PE	15:0_15:0	662.476	[M-H]-	-1	24:1.2	-1	-20	Standard
PE	14:0_16:0	662.476	[M-H]-	-1	227.2	-1	-20
PE	14:0_16:0	662.476	[M-H]-	-1	255.23	-1	-20
PE	16:3_16:3	678.414	[M-H]-	-1	249.2	-1	-20
PE	16:2_16:3	680.43	[M-H]-	-1	251.2	-1	-20
PE	16:2_16:3	680.43	[M-H]-	-1	249.2	-1	-20
PE	16:2_16:2	682.445	[M-H]-	-1	251.2	-1	-20
PE	16:1_16:3	682.445	[M-H]-	-1	253.2	-1	-20
PE	16:1_16:3	682.445	[M-H]-	-1	249.2	-1	-20
PE	12:0cp_18:2	684.46	[M-H]-	-1	225.1	-1	-20
PE	12:0cp_18:2	684.46	[M-H]-	-1	279.2	-1	-20
PE	14:0_18:3	684.46	[M-H]-	-1	227.1	-1	-20
PE	14:0_18:3	684.46	[M-H]-	-1	277.2	-1	-20
PE	16:0_16:3	684.46	[M-H]-	-1	255.2	-1	-20
PE	16:0_16:3	684.46	[M-H]-	-1	249.2	-1	-20
PE	16:1_16:2	684.46	[M-H]-	-1	253.2	-1	-20
PE	16:1_16:2	684.46	[M-H]-	-1	251.2	-1	-20
PE	16:0_16:2	686.476	[M-H]-	-1	255.2	-1	-20
PE	16:0_16:2	686.476	[M-H]-	-1	251.2	-1	-20
PE	14:0_18:2	686.476	[M-H]-	-1	227.1	-1	-20
PE	14:0_18:2	686.476	[M-H]-	-1	279.2	-1	-20
PE	12:0cp_18:1	686.476	[M-H]-	-1	225.1	-1	-20
PE	12:0cp_18:1	686.476	[M-H]-	-1	281.2	-1	-20
PE	16:1_16:1	686.477	[M-H]-	-1	253.2	-1	-20
PE	14:0_18:1	688.492	[M-H]-	-1	227.1	-1	-20
PE	14:0_18:1	688.492	[M-H]-	-1	281.2	-1	-20
PE	16:0_16:0	690.507	[M-H]-	-1	255.2	-1	-20
PE	16:0_16:0	690.507	[M-H]-	-1	255.2	-1	-20
PE	15:0_18:3	698.477	[M-H]-	-1	24:1.2	-1	-20
PE	15:0_18:3	698.477	[M-H]-	-1	277.2	-1	-20
PE	15:0_18:2	700.492	[M-H]-	-1	24:1.2	-1	-20
PE	15:0_18:2	700.492	[M-H]-	-1	279.2	-1	-20
PE	15:0_18:1	702.507	[M-H]-	-1	24:1.2	-1	-20
PE	15:0_18:1	702.507	[M-H]-	-1	281.24	-1	-20
PE	16:3_18:3	706.446	[M-H]-	-1	249.2	-1	-20
PE	16:3_18:3	706.446	[M-H]-	-1	277.2	-1	-20
PE	16:3_18:2	708.461	[M-H]-	-1	249.2	-1	-20
PE	16:3_18:2	708.461	[M-H]-	-1	279.2	-1	-20
PE	16:2_18:3	708.461	[M-H]-	-1	251.2	-1	-20
PE	16:2_18:3	708.461	[M-H]-	-1	277.2	-1	-20
PE	16:1_18:3	710.476	[M-H]-	-1	253.2	-1	-20
PE	16:1_18:3	710.476	[M-H]-	-1	277.2	-1	-20
PE	16:3_18:1	710.476	[M-H]-	-1	249.23	-1	-20
PE	16:3_18:1	710.476	[M-H]-	-1	281.2	-1	-20
PE	16:2_18:2	710.476	[M-H]-	-1	251.2	-1	-20
PE	16:2_18:2	710.476	[M-H]-	-1	279.2	-1	-20
PE	16:0_18:3	712.492	[M-H]-	-1	255.2	-1	-20
PE	16:0_18:3	712.492	[M-H]-	-1	277.2	-1	-20
PE	16:2_18:1	712.492	[M-H]-	-1	251.2	-1	-20
PE	16:2_18:1	712.492	[M-H]-	-1	281.2	-1	-20
PE	16:1_18:2	712.492	[M-H]-	-1	253.2	-1	-20
PE	16:1_18:2	712.492	[M-H]-	-1	279.2	-1	-20
PE	16:0_18:2	714.507	[M-H]-	-1	255.2	-1	-20
PE	16:0_18:2	714.507	[M-H]-	-1	279.2	-1	-20
PE	16:1_18:1	714.507	[M-H]-	-1	253.2	-1	-20
PE	16:1_18:1	714.507	[M-H]-	-1	281.2	-1	-20
PE	16:0_18:1	716.523	[M-H]-	-1	255.2	-1	-20
PE	16:0_18:1	716.523	[M-H]-	-1	281.2	-1	-20
PE	18:3_18:3	734.476	[M-H]-	-1	277.2	-1	-20
PE	17:1_18:1	728.523	[M-H]-	-1	267.23	-1	-20
PE	17:1_18:1	728.523	[M-H]-	-1	281.24	-1	-20
PE	17:0_18:2	728.523	[M-H]-	-1	269.24	-1	-20
PE	17:0_18:2	728.523	[M-H]-	-1	279.23	-1	-20
PE	17:0_18:1	730.539	[M-H]-	-1	269.24	-1	-20
PE	17:0_18:1	730.539	[M-H]-	-1	281.24	-1	-20
PE	16:2_20:4	734.476	[M-H]-	-1	251.4	-1	-20
PE	16:2_20:4	734.476	[M-H]-	-1	303.25	-1	-20
PE	16:1_205	734.476	[M-H]-	-1	253.4	-1	-20
PE	16:1_205	734.476	[M-H]-	-1	301.25	-1	-20
PE	16:3_20:3	734.476	[M-H]-	-1	249.4	-1	-20
PE	16:3_20:3	734.476	[M-H]-	-1	305.25	-1	-20
PE	18:3_18:3	734.476	[M-H]-	-1	277.2	-1	-20
PE	18:2_18:3	736.492	[M-H]-	-1	279.2	-1	-20
PE	18:2_18:3	736.492	[M-H]-	-1	277.2	-1	-20
PE	16:2_20:3	736.492	[M-H]-	-1	251.4	-1	-20
PE	16:2_20:3	736.492	[M-H]-	-1	305.25	-1	-20
PE	16:1_20:4	736.492	[M-H]-	-1	253.4	-1	-20
PE	16:1_20:4	736.492	[M-H]-	-1	303.25	-1	-20
PE	16:3_20:2	736.492	[M-H]-	-1	249.23	-1	-20
PE	16:3_20:2	736.492	[M-H]-	-1	307.25	-1	-20
PE	18:1_18:3	738.507	[M-H]-	-1	281.2	-1	-20
PE	18:1_18:3	738.507	[M-H]-	-1	277.2	-1	-20
PE	16:2_20:2	738.507	[M-H]-	-1	251.4	-1	-20
PE	16:2_20:2	738.507	[M-H]-	-1	307.26	-1	-20
PE	18:2_18:2	738.507	[M-H]-	-1	279.2	-1	-20
PE	16:3_20:1	738.507	[M-H]-	-1	309.27	-1	-20
PE	16:3_20:1	738.507	[M-H]-	-1	249.23	-1	-20
PE	16:1_20:3	738.507	[M-H]-	-1	253.4	-1	-20
PE	16:1_20:3	738.507	[M-H]-	-1	305.248	-1	-20
PE	16:2_20:1	740.523	[M-H]-	-1	251.4	-1	-20
PE	16:2_20:1	740.523	[M-H]-	-1	309.264	-1	-20
PE	18:1_18:2	740.523	[M-H]-	-1	281.2	-1	-20
PE	18:1_18:2	740.523	[M-H]-	-1	279.2	-1	-20
PE	18:0_18:3	740.523	[M-H]-	-1	283.26	-1	-20
PE	18:0_18:3	740.523	[M-H]-	-1	277.22	-1	-20
PE	16:1_20:2	740.523	[M-H]-	-1	253.2	-1	-20
PE	16:1_20:2	740.523	[M-H]-	-1	307.264	-1	-20
PE	16:0_20:3	740.523	[M-H]-	-1	255.232	-1	-20
PE	16:0_20:3	740.523	[M-H]-	-1	305.248	-1	-20
PE	18:0_18:2	742.539	[M-H]-	-1	283.2	-1	-20
PE	18:0_18:2	742.539	[M-H]-	-1	279.2	-1	-20
PE	18:1_18:1	742.539	[M-H]-	-1	281.2	-1	-20
PE	16:1_20:1	742.539	[M-H]-	-1	253.2	-1	-20
PE	16:1_20:1	742.539	[M-H]-	-1	309.279	-1	-20
PE	16:0_20:2	742.539	[M-H]-	-1	255.23	-1	-20
PE	16:0_20:2	742.539	[M-H]-	-1	307.264	-1	-20
PE	18:0_18:1	744.554	[M-H]-	-1	283.26	-1	-20
PE	18:0_18:1	744.554	[M-H]-	-1	281.25	-1	-20
PE	16:0_20:1	744.554	[M-H]-	-1	255.23	-1	-20
PE	16:0_20:1	744.554	[M-H]-	-1	309.28	-1	-20
PE	16:0_20:0	746.54	[M-H]-	-1	255.23	-1	-20
PE	16:0_20:0	746.54	[M-H]-	-1	311.29	-1	-20
PE	18:2_20:4	762.507	[M-H]-	-1	279.2	-1	-20
PE	18:2_20:4	762.507	[M-H]-	-1	303.3	-1	-20
PE	18:2_20:3	764.52	[M-H]-	-1	305.25	-1	-20
PE	18:2_20:3	764.52	[M-H]-	-1	279.2	-1	-20
PE	18:1_20:4	764.52	[M-H]-	-1	303.23	-1	-20
PE	18:1_20:4	764.52	[M-H]-	-1	281.24	-1	-20
PE	18:2_20:2	766.539	[M-H]-	-1	307.26	-1	-20
PE	18:2_20:2	766.539	[M-H]-	-1	279.23	-1	-20
PE	18:1_20:3	766.539	[M-H]-	-1	281.2	-1	-20
PE	18:1_20:3	766.539	[M-H]-	-1	305.25	-1	-20
PE	16:3_22:1	766.539	[M-H]-	-1	249.23	-1	-20
PE	16:3_22:1	766.539	[M-H]-	-1	337.311	-1	-20
PE	16:2_22:2	766.539	[M-H]-	-1	251.23	-1	-20
PE	16:2_22:2	766.539	[M-H]-	-1	335.32	-1	-20
PE	16:1_22:3	766.539	[M-H]-	-1	253.23	-1	-20
PE	16:1_22:3	766.539	[M-H]-	-1	333.32	-1	-20
PE	16:0_224	766.539	[M-H]-	-1	331.32	-1	-20
PE	16:0_224	766.539	[M-H]-	-1	255.23	-1	-20
PE	18:3_20:0	768.554	[M-H]-	-1	277.23	-1	-20
PE	18:3_20:0	768.554	[M-H]-	-1	311.28	-1	-20
PE	18:2_20:1	768.554	[M-H]-	-1	309.28	-1	-20
PE	18:2_20:1	768.554	[M-H]-	-1	279.23	-1	-20
PE	16:3_22:0	768.554	[M-H]-	-1	249.23	-1	-20
PE	16:3_22:0	768.554	[M-H]-	-1	339.326	-1	-20
PE	16:2_22:1	768.554	[M-H]-	-1	251.23	-1	-20
PE	16:2_22:1	768.554	[M-H]-	-1	337.326	-1	-20
PE	16:1_22:2	768.554	[M-H]-	-1	253.23	-1	-20
PE	16:1_22:2	768.554	[M-H]-	-1	335.326	-1	-20
PE	16:0_22:3	768.554	[M-H]-	-1	255.23	-1	-20
PE	16:0_22:3	768.554	[M-H]-	-1	333.326	-1	-20
PE	18:2_20:0	770.57	[M-H]-	-1	311.29	-1	-20
PE	18:2_20:0	770.57	[M-H]-	-1	279.23	-1	-20
PE	16:1_22:1	770.57	[M-H]-	-1	253.23	-1	-20
PE	16:1_22:1	770.57	[M-H]-	-1	337.326	-1	-20
PE	16:2_22:0	770.57	[M-H]-	-1	251.23	-1	-20
PE	16:2_22:0	770.57	[M-H]-	-1	339.326	-1	-20
PE	16:0_22:2	770.57	[M-H]-	-1	255.23	-1	-20
PE	16:0_22:2	770.57	[M-H]-	-1	335.326	-1	-20
PE	18:2_210	784.586	[M-H]-	-1	325.311	-1	-20
PE	18:2_210	784.586	[M-H]-	-1	279.23	-1	-20
PE	18:1_210	786.601	[M-H]-	-1	325.311	-1	-20
PE	18:1_210	786.601	[M-H]-	-1	281.23	-1	-20
PE	22:2_18:2	794.571	[M-H]-	-1	335.311	-1	-20
PE	22:2_18:2	794.571	[M-H]-	-1	279.232	-1	-20
PE	22:1_18:3	794.571	[M-H]-	-1	337.311	-1	-20
PE	22:1_18:3	794.571	[M-H]-	-1	277.232	-1	-20
PE	18:3_22:0	796.6	[M-H]-	-1	339.3	-1	-20
PE	18:3_22:0	796.6	[M-H]-	-1	277.2	-1	-20
PE	20:1_20:1	798.601	[M-H]-	-1	309.281	-1	-20
PE	20:2_20:0	798.601	[M-H]-	-1	311.295	-1	-20
PE	20:2_20:0	798.601	[M-H]-	-1	307.267	-1	-20
PE	18:2_22:0	798.601	[M-H]-	-1	279.2	-1	-20
PE	18:2_22:0	798.601	[M-H]-	-1	339.3	-1	-20
PE	18:1_22:0	800.616	[M-H]-	-1	281.23	-1	-20
PE	18:1_22:0	800.616	[M-H]-	-1	339.3	-1	-20
PE	20:2_22:1	824.586	[M-H]-	-1	307.267	-1	-20
PE	20:2_22:1	824.586	[M-H]-	-1	337.281	-1	-20
PE	18:3_24:0	824.586	[M-H]-	-1	277.232	-1	-20
PE	18:3_24:0	824.586	[M-H]-	-1	367.34	-1	-20
PE	20:2_22:0	826.601	[M-H]-	-1	307.267	-1	-20
PE	20:2_22:0	826.601	[M-H]-	-1	339.295	-1	-20
PE	20:1_22:1	826.601	[M-H]-	-1	309.281	-1	-20
PE	20:1_22:1	826.601	[M-H]-	-1	337.281	-1	-20
PE	18:2_24:0	826.601	[M-H]-	-1	279.23	-1	-20
PE	18:2_24:0	826.601	[M-H]-	-1	367.34	-1	-20
PE	18:1_24:0	828.616	[M-H]-	-1	281.23	-1	-20
PE	18:1_24:0	828.616	[M-H]-	-1	367.34	-1	-20
PE	20:0_22:1	828.649	[M-H]-	-1	311.295	-1	-20
PE	20:0_22:1	828.649	[M-H]-	-1	337.281	-1	-20
PE	20:1_22:0	828.649	[M-H]-	-1	309.281	-1	-20
PE	20:1_22:0	828.649	[M-H]-	-1	339.295	-1	-20
