# Supplementary material for: Uptake and Metabolic Conversion of Exogenous Phosphatidylcholines Depending on Their Acyl Chain Structure in Arabidopsis thaliana
Source: Int J Mol Sci. 2023 Dec 20;25(1):89. doi: 10.3390/ijms25010089 (PMC10778594; doi:10.3390/ijms25010089)
Supplement: Supplementary file 1 [file ijms-25-00089-s001.zip › Table S2 Mol species composition.xlsx]

## Sheet: Lipidomics data
Table S2. Molecular species composition under exogenous PC treatment
The table shows relative abundance (percentage) of each lipid species. Values were calculated by dividing the peak areas of each lipid species by the sum of the total peak areas and then by multiplication by 100(%).
Molecular species composition of PC in roots (%)
Exogenous lipid	12:0cp_12:0cp	14:0_16:0	12:0cp_16:0	12:0cp_18:2	12:0cp_181	14:0_18:2	14:0_18:1	16:0_16:3	16:0_16:2	16:0_16:1	16:0/16:0	150_18:2	16:3_18:4	16:3_18:3	16:3_18:2	16:1_18:3	16:0_18:3	16:1_18:2	16:0_18:2	16:0_18:1	17:0_18:2	18:3/18:3	18:2_18:3	18:1_18:3	18:2/18:2	18:1_18:2	18:0_18:2	18:1/18:1	18:0_18:1	18:2_20:2	18:2_20:0	24:0_18:2
Control	0	0	0	0	0	0.549225	0.0156592	0.0240493	0.11596	1.0898	0.168865	0.281314	0.0683396	0.0246984	0.0390697	1.72198	11.5928	1.22902	15.2284	4.19514	0.183188	16.1412	19.6025	3.59987	8.62844	5.65586	2.81741	1.34821	0.223159	0.0932009	0.0717698	0.0389433
16:0/16:0 PC	0	0	0	0	0	0.498884	0.0210332	0.0112837	0.0348979	0.869738	0.98693	0.180666	0.056744	0.0245938	0.0114869	1.41136	9.62613	1.19389	13.0866	4.75185	0.209919	15.8222	19.7712	4.03294	8.48419	7.24248	1.8583	2.28179	0.386626	0.0522617	0.0566601	0.0208806
16:0/18:1 PC	0	0	0	0	0	0.57673	0.0478654	0.0147182	0.0775452	0.852664	0.0777431	0.149222	0.0496166	0.0205817	0.0287934	1.25387	8.83683	1.25818	12.8399	7.72533	0.121326	13.7383	18.5196	4.75032	8.89741	8.78692	2.12581	3.08467	0.358269	0.0685162	0.0356369	0.0504889
16:0/18:2 PC	0	0	0	0	0	0.50159	0.0545298	0.0048014	0.0616755	1.0245	0.205747	0.150239	0.0677381	0.0113033	0.00397461	1.1594	11.8752	1.07243	15.3303	5.27396	0.0642253	13.1776	18.2684	3.9514	8.77838	6.62833	1.80387	1.79751	0.117921	0.0437082	0.0312328	0.0261205
12:0cp/12:0cp PC	1.29759	0	3.52092	7.64992	0.694961	0.390439	0.0783477	0.0151786	0.0672372	0.67153	0.109166	0.160753	tr	0.018908	0.0227035	tr	9.57525	0.988436	14.8446	4.01056	0.157865	12.0448	18.0441	4.50855	10.0596	6.27717	1.77708	2.31447	0.482645	0.093304	0.0309249	0.0199472
14:0/14:0 PC	0	0.123973	0	0	0	2.58226	0.246417	0.00709982	0.0550188	0.740955	0.0449352	0.108692	tr	0.0101907	0.0202174	tr	11.6208	1.0543	18.5225	5.47074	0.103404	10.857	18.076	5.01753	10.5649	8.32494	2.30465	3.39135	0.554134	0.0547898	0.11412	0.0191829
18:2/18:2 PC	0	0	0	0	0	0.368242	0.0460731	0.00729019	0.0190059	0.712405	0.103766	0.088842	tr	0.0172651	0.0048333	tr	9.99923	1.05233	16.7826	6.46335	0.118481	10.4097	19.2373	5.75088	11.875	9.37795	1.86952	4.81489	0.541831	0.048389	0.240211	0.0209127
	SD	SD	SD	SD	SD	SD	SD	SD	SD	SD	SD	SD	SD	SD	SD	SD	SD	SD	SD	SD	SD	SD	SD	SD	SD	SD	SD	SD	SD	SD	SD	SD
Ctrl	0	0	0	0	0	0.0638682	0.00774839	0.0200814	0.0520794	0.131374	0.0368294	0.0809939	0.0203853	0.00566112	0.0239801	0.350607	0.882955	0.152478	2.89682	0.283626	0.102183	1.82651	0.56527	0.372855	1.31378	0.446546	0.304901	0.394996	0.231039	0.0306987	0.037216	0.016784
d16:0	0	0	0	0	0	0.0511744	0.0118536	0.0115737	0.00897386	0.0481535	0.339804	0.0112852	0.00976926	0.0248429	0.00426347	0.234826	0.467953	0.146719	0.345988	0.261591	0.021702	0.087141	0.821102	0.119743	0.428503	0.431484	0.177636	0.280486	0.0369939	0.0478869	0.060021	0.0185516
16:0/18:1	0	0	0	0	0	0.0507396	0.0123599	0.00445831	0.024458	0.153002	0.0341942	0.0575101	0.0026473	0.0115007	0.0284416	0.146587	0.238769	0.0769589	0.222744	1.31557	0.0212814	0.505152	1.91121	0.230361	0.401904	0.802966	0.179092	0.586079	0.192797	0.0188406	0.0300365	0.00514254
16:0/18:2	0	0	0	0	0	0.0990695	0.0152041	0.00831626	0.0473258	0.0796243	0.0831222	0.047968	0.0308263	0.00761215	0.00344792	0.19928	0.793299	0.115804	0.0439673	0.300041	0.0187123	0.58295	0.549103	0.202016	0.104825	0.359948	0.226951	0.213031	0.105235	0.0438564	0.00883503	0.0177117
12:0cp/12:0cp PC	0.858727	0	1.64816	2.54557	0.334783	0.0718849	0.03141	0	0.0471227	0.185488	0.0341678	0.0490417	0	0.0135082	0.0188754	0	0.814511	0.14194	1.2764	0.138657	0.061166	0.821822	1.99612	0.0602447	1.10604	0.424556	0.0738767	0.427626	0.176119	0.0773282	0.0338105	0.0147935
d14:0	0	0.0383472	0	0	0	0.836923	0.172584	0.00177973	0.0247894	0.166304	0.0297824	0.0377926	0	0.00770113	0.015338	0	1.9977	0.254296	1.45019	1.22861	0.0597971	1.03854	0.957515	0.476081	0.911123	0.733371	0.374861	1.4617	0.399997	0.0337205	0.131816	0.0119633
d18:2	0	0	0	0	0	0.197496	0.0310469	0.00627598	0.00982922	0.0936923	0.0675052	0.0115472	0	0.0083572	0.00541803	0	2.67056	0.169782	2.54049	1.35932	0.0287092	1.33171	0.537667	0.80259	0.87263	1.34648	0.174546	1.8954	0.259991	0.04606	0.257144	0.0181245
Molecular species composition of PC in cotyledons (%)
Exogenous lipid	12:0cp_12:0cp	14:0_16:0	12:0cp_16:0	12:0cp_18:2	12:0cp_181	14:0_18:2	14:0_18:1	16:0_16:3	16:0_16:2	16:0_16:1	16:0/16:0	150_18:2	16:3_18:4	16:3_18:3	16:3_18:2	16:1_18:3	16:0_18:3	16:1_18:2	16:0_18:2	16:0_18:1	17:0_18:2	18:3/18:3	18:2_18:3	18:1_18:3	18:2/18:2	18:1_18:2	18:0_18:2	18:1/18:1	18:0_18:1	18:2_20:2	18:2_20:0	24:0_18:2
Control	0	0.00301054	0	0	0	0.336706	0.0595671	0.171974	0.152801	0.626955	0.114179	0.12483	0	0.536116	0.398581	1.45662	6.86692	1.36661	13.7409	6.73799	0.403186	12.5425	17.2872	4.92458	9.98385	9.10483	5.91632	2.01268	1.52553	3.21255	0.258551	0.0567765
16:0/16:0 PC	0	0.00239254	0	0	0	0.259465	0.0333331	0.060934	0.0878911	0.552482	0.388633	0.081356	0	0.386844	0.214126	1.8056	6.56189	1.2959	11.611	5.07778	0.232765	14.7098	18.1768	5.04	10.048	9.09014	3.79125	1.88769	0.924689	3.19684	0.335085	0.018996
16:0/18:1 PC	0	0	0	0	0	0.324182	0.0315578	0.090543	0.108325	0.547488	0.0691813	0.0783051	0	0.515108	0.267495	1.41572	6.30301	1.2094	12.6795	6.64755	0.306682	13.8029	17.5888	4.48011	9.91963	9.34735	4.36035	1.71785	0.93609	3.44546	0.165744	0.0219571
16:0/18:2 PC	0	0.00092754	0	0	0	0.315193	0.0233791	0.10585	0.122081	0.530135	0.0335932	0.116171	0	0.420643	0.257256	1.68112	6.45346	1.26101	11.806	5.5373	0.264777	14.6113	18.349	4.66792	10.0854	9.00616	4.36303	1.84905	1.03167	3.01254	0.175593	0.0224843
12:0cp/12:0cp PC	1.60601	0.0140606	0.120571	0.378224	0.0191855	0.397181	0.0382524	0.0494948	0.10381	0.671718	0.0612952	0.0928771	0	0.519107	0.256492	0	7.01204	1.62579	13.9863	5.7946	0.360292	13.0061	17.7882	5.16382	10.5679	8.58866	4.90762	1.75211	1.0351	3.79946	0.185667	0.0227366
14:0/14:0 PC	0	0	0	0	0	0.505261	0.0580175	0.104298	0.0664237	0.456121	0.0234653	0.0764074	0	0.537409	0.26506	0	7.04566	1.31106	13.7109	4.91786	0.166037	14.6897	20.0348	5.51437	12.2876	8.53623	3.95071	1.82134	0.798726	2.87066	0.180237	0.00646033
18:2/18:2 PC	0	0.00290398	0.0147237	0.00644944	0.000790477	0.395492	0.0657413	0.0811569	0.118427	0.655177	0.104861	0.12692	0	0.646317	0.222971	0	6.35843	1.5726	14.3201	7.25336	0.427832	10.7247	17.0493	5.68748	10.4723	10.1356	5.03073	2.97859	1.27094	3.77747	0.399349	0.0227595
	SD	SD	SD	SD	SD	SD	SD	SD	SD	SD	SD	SD	SD	SD	SD	SD	SD	SD	SD	SD	SD	SD	SD	SD	SD	SD	SD	SD	SD	SD	SD	SD
Control	0	0.00272085	0	0	0	0.0554744	0.0361647	0.0608465	0.0356685	0.0894547	0.060588	0.0344745		0.12351	0.122728	0.277924	0.499303	0.156695	1.11615	0.459607	0.0403476	0.986695	1.10598	0.586891	0.938926	0.524272	0.589861	0.333406	0.436429	0.397122	0.135974	0.00791875
16:0/16:0 PC	0	0.00213674	0	0	0	0.0894757	0.0166096	0.0466165	0.0266067	0.0339067	0.348986	0.027139		0.115935	0.0603609	0.347038	0.138715	0.16736	0.382358	0.770995	0.0463796	0.162207	0.673292	0.32257	0.565601	0.412417	0.394595	0.156667	0.09895	0.202688	0.390103	0.0218968
16:0/18:1 PC	0	0	0	0	0	0.0302815	0.0149732	0.0208836	0.0169248	0.102214	0.0233671	0.0131245		0.0968936	0.0669005	0.385115	0.144127	0.0551637	0.304159	0.194048	0.0300351	0.308208	0.529748	0.166737	0.415826	0.617068	0.108949	0.186315	0.131402	0.260098	0.0809708	0.0135686
16:0/18:2 PC	0	0.00160655	0	0	0	0.0640035	0.0123196	0.0399572	0.0234712	0.0548252	0.0094742	0.0192369		0.112393	0.0268588	0.219336	0.269812	0.167864	0.643542	0.905706	0.0451367	1.29333	1.13514	0.277403	0.185832	1.12945	0.391718	0.252547	0.124888	0.148478	0.039785	0.00959023
12:0cp/12:0cp PC	1.15941	0.0129559	0.0543383	0.158991	0.0142446	0.0492399	0.0336156	0.030345	0.0328049	0.130171	0.00916427	0.0343424		0.0580917	0.0233542	0	0.771366	0.292895	0.348557	0.540884	0.024244	1.88761	1.37818	0.313104	0.578961	1.09499	0.557386	0.34922	0.323375	0.689773	0.129431	0.0177469
14:0/14:0 PC	0	0	0	0	0	0.1243	0.0207318	0.0214505	0.00982382	0.0623121	0.0197006	0.00963478		0.187919	0.0596963	0	0.469402	0.0228664	0.153454	0.398529	0.135412	0.391071	1.1749	0.15764	0.77263	0.749065	0.414519	0.336588	0.13621	0.260403	0.107921	0.00301219
18:2/18:2 PC	0	0.00260057	0.00628948	0.00353137	0.0011179	0.0622182	0.0568242	0.0244033	0.008741	0.14791	0.0308061	0.0228506		0.16826	0.0880483	0	0.177942	0.22421	0.469027	1.15429	0.126055	0.598993	0.411107	0.122514	0.959619	0.743492	0.555721	0.213631	0.149505	0.274601	0.175994	0.00546741
Molecular species composition of PE in roots (%)
Exogenous lipid	12:0cp_16:0	12:0cp_18:2	14:0_18:3	16:0_16:3	16:0_16:2	14:0_18:2	12:0cp_18:1	14:0_18:1	16:0/16:0	15:0_18:3	15:0_18:2	16:3_18:3	16:3_18:2	16:2_18:3	16:1_18:3	16:0_18:3	16:1_18:2	16:0_18:2	16:1_18:1	16:0_18:1	18:3/18:3	17:0_18:2	17:0_18:1	18:2_18:3	18:1_18:3	18:2/18:2	18:1_18:2	18:0_18:3	18:0_18:2	18:1/18:1	18:0_18:1	18:2_20:3	18:2_20:2	18:2_20:1	18:2_20:0	22:2_18:2	18:3_22:0	18:2_22:0	18:2_24:0	18:1_24:0
Control	0	0	1.06389	1.05955	0.111363	0.265497	0	0	0.00753982	0.190957	0.3248	0.0307753	0.022619	0.0489119	8.90209	18.3411	0.543205	26	0.061099	0.732432	6.04918	0.193058	0.017735	11.7781	2.38843	6.53028	2.62758	0.908035	1.32559	0.180287	0.00642532	0	0.0455934	0.0732878	0.261153	0.0456659	0.437399	1.09482	1.30709	0.0155061
16:0/16:0 PC	0	0	0.984977	0.601108	0.021728	0.47081	0	0.0289677	0	0.0941473	0.231749	0.00724214	0	0.043456	5.94805	13.0139	0.456266	22.3333	0.0724182	1.99182	6.49166	0.0941514	0	11.8089	2.59298	8.36238	3.3465	0.869082	0.992165	0.449029	0.0289693	0	0	0.0796675	0.347638	0.0362093	0.478	1.11532	1.26759	0.1883
16:0/18:1 PC	0	0	0.62884	0.50983	0.0785052	0.525583	0	0.00570479	0	0.217267	0.167058	0.0219109	0.0109557	0.0228191	4.76553	13.9761	0.863995	24.4322	0.16797	2.70054	5.35441	0.117304	0	12.0012	2.96921	10.0208	4.43609	1.02476	1.51779	0.563669	0.106344	0	0.0114098	0.0908221	0.462376	0.0228191	0.429963	1.09873	1.3997	0.146055
16:0/18:2 PC	0	0	0.324532	0.577907	0.116989	0.19649	0	0.0398973	0	0.134766	0.176012	0	0.0431215	0	4.42314	14.5592	0.432344	25.3483	0.0242615	1.21135	5.41703	0.106192	0	11.8044	2.39101	8.28075	3.52738	0.725348	1.01398	0.167381	0	0.0199483	0	0.0172496	0.284081	0.11212	0.357949	0.996227	1.28527	0.120743
12:0cp/12:0cp PC	0.406641	0.552354	0.282769	0	0.188471	0.67725	0.0941477	0.0471502	0.036695	0.145736	0.186727	0	0.0470755	0	4.1	17.3874	0.552533	22.53	0.117762	2.12901	7.20994	0.176666	0	16.2199	3.04642	13.1094	3.18608	0.650984	1.33297	0.228573	0.0589012	0.137106	0.0851766	0.151008	0.123089	0.146777	0.583033	1.4622	1.68837	0.329511
14:0/14:0 PC	0	0	0.970772	0	0	1.64245	0	0.0737204	0	0.293839	0.363091	0	0	0	3.8	18.4103	0.341545	30.4715	0.0839555	2.07777	6.05287	0.0839525	0	14.4302	3.39785	11.8599	3.68443	0.898992	1.04848	0.426653	0.0629644	0.26825	0.253372	0.114229	0.295348	0.210921	0.467894	0.93629	0.891198	0.335822
18:2/18:2 PC	0		0.2389	0	0.0480785	0.36277	0	0.0480768	0	0.0573947	0.211917	0	0	0	3.3	14.7733	0.549609	29.6679	0.432714	3.35091	4.77712	0	0.0240388	15.0034	4.31626	10.9584	5.29203	0.913962	1.69163	1.95848	0	0.111608	0.550533	0.101873	0.489997	0.0222372	0.390721	2.22766	0.874122	0.286975
	SD	SD	SD	SD	SD	SD	SD	SD	SD	SD	SD	SD	SD	SD	SD	SD	SD	SD	SD	SD	SD	SD	SD	SD	SD	SD	SD	SD	SD	SD	SD	SD	SD	SD	SD	SD	SD	SD	SD	SD
Control	0	0	0.427424	0.14365	0.130474	0.215777		0	0.0130593	0.165549	0.134891	0.029802	0.0391773	0.0751365	2.61871	0.658857	0.092855	2	0.0366504	0.680063	0.378335	0.10755	0.0241498	1.54341	0.80094	1.29029	0.44429	0.543416	0.157001	0.0434379	0.00581019	0	0.0396232	0.0504571	0.0484059	0.0596091	0.226247	0.438672	0.468911	0.0134439
16:0/16:0 PC	0	0	0.0410342	0.174078	0.030728	0.174186		0.0409665	0	0.0921737	0.184345	0.0102419	0	0.0614561	0.235078	0.409859	0.215112	0.642605	0.0819294	0.112478	0.76895	0.0307328	0	0.84084	0.123076	0.410852	0.348423	0.225339	0.0922415	0.266334	1.90029e-06	0	0	0.0307361	0.184383	0.0512077	0.184391	0.12298	0.133014	0.143396
16:0/18:1 PC	0	0	0.00619138	0.0857681	0.0180611	0.0150838		0.0080678	0	0.0490929	0.0426298	0.0309868	0.0154937	0.0322711	1.31514	1.20535	0.230297	0.468006	0.0206335	0.0537199	0.720401	0.00453751	0	0.0314124	0.0773889	0.591656	0.374684	0.255244	0.209619	0.332339	0.0109557	0	0.0161358	0.0974556	0.105291	0.0322711	0.0271806	0.166108	0.166714	0.0516159
16:0/18:2 PC	0	0	0.105256	0.0854736	0.116659	0.136821		0.0564233	0	0.0777428	0.00498191	0	0.060983	0	0.3	1.7	0.0472029	1.69195	0.0221136	0.712964	0.804756	0.0937582	0	1.22436	0.277892	1.2973	0.23116	0.0744798	0.249115	0.0171781	0	0.0282112	0	0.0243946	0.232484	0.158562	0.0548379	0.0547421	0.0121272	0.170756
12:0cp/12:0cp PC	0.19465	0.446672	0.124557	0	0.0335268	0.173407				0.100884	0.117663	0		0	0.72	1.5	0.392391	0.464239	0.0331734	0.585554	1.37122	0.0164511	0	2.74309	0.097004	1.51783	0.444218	0.287519	0.375393	0.163997	0.0167229	0.135995	0.0871167	0.0124561	0.0371883		0.0949143	0.227665	0.723124
14:0/14:0 PC	0	0	0.521348	0	0	0.374226	0	0.044891	0		0.0831031	0	0	0	0.95	2.61269	0.195815	2.52727		1.12312	1.18646		0	1.83334	0.518592	1.17936	1.01254	0.136029	0.32258	0.305578		0.00650634	0.122624	0.0131299	0.0653896		0.139704	0.397006	0.611235
18:2/18:2 PC	0	0.12	0.133876	0		0.149837	0		0	0.0131762	0.147344	0	0	0	1.1	2.17125	0.242635	2.67672		1.22069	1.71205	0		0.925741	0.75421	2.44002	0.952448	0.128899	0.532893	0.7	0	0.0218515	0.640447	0.0760753	0.575795		0.013504	0.722872	0.646977	0.0658954
Molecular species composition of PE in cotyledons (%)
Exogenous lipid	Cy12:0_16:0	Cy12:0_18:2	Cy12:0_18:1	14:0_18:3	14:0_18:2	14:0_18:1	16:0_16:3	16:0_16:2	16:0/16:0	15:0_18:3	15:0_18:2	16:3_18:3	16:3_18:2	162_18:3	16:1_18:3	16:0_18:3	16:1_18:2	16:0_18:2	16:1_18:1	16:0_18:1	18:3/18:3	17:0_18:2	17:0_18:1	18:2_18:3	18:1_18:3	18:2/18:2	18:1_18:2	18:0_18:3	18:0_18:2	18:1/18:1	16:0_20:2	18:0_18:1	16:0_20:1	18:2_20:3	18:2_20:2	18:2_20:1	18:2_20:0	22:2_18:2	18:3_22:0	18:2_22:0	18:2_24:0
Control	0	0.112293	0.0027114	0.466845	0.116874	0.0909492	0.166393	0.210867	0.11613	0.239536	0.241999	0.189765	0.836178	0.275714	0.421587	13.2169	0.905915	23.2948	0.0623903	1.62929	6.52715	0.411111	0.0834832	14.8278	2.61724	11.2279	3.87605	2.04323	3.28812	0.226885	0.0430281	0.0367087	0.0445885	0.836972	2.3206	2.59006	0.538454	0.0587192	0.477412	1.20324	1.28429
16:0/16:0 PC	0	0.137088	0	0.859983	0.0118761	0.0981178	0.0489357	0.113584	0.143361	0.136341	0.211807	0.0746573	1.3219	0.397003	0	13.1993	0.876661	21.9546	0.0437729	1.14683	6.64839	0.352455	0.0152847	14.8353	2.60051	11.6958	4.19414	1.34394	2.22164	0.101312	0.0168811	0.10013	0	0.605093	2.31729	2.9685	0.428564	0.0381919	0.34025	0.875435	0.651116
16:0/18:1 PC	0	0.440508	0.00295376	0.99606	0	0.138444	0.0380722	0.197498	0.141841	0.276524	0.216728	0.0688028	1.7694	0.474176	0.0123884	13.7711	0.875161	22.7227	0.00943495	1.33205	5.94373	0.336457	0.00931454	15.1465	2.42114	11.7651	3.92524	1.53958	2.16584	0.22842	0.028184	0.0362367	0.0388857	0.570025	1.91705	2.47057	0.52851	0.0539124	0.303745	0.72425	0.61736
16:0/18:2 PC	0	0.122329	0.0294993	0.708575	0	0.0899902	0.0877315	0.197494	0.142136	0.111696	0.218996	0.0660855	1.75123	0.455012	0.00855711	13.088	1.09175	24.1683	0.0532288	1.20481	5.86954	0.162952	0	14.145	2.31828	11.846	3.66769	1.69235	2.39041	0.140537	0.0397604	0.0828734	0.0227158	0.537659	1.88404	2.40438	0.501457	0.0287677	0.43144	1.06408	0.736764
12:0cp/12:0cp PC	0	0.0120922	0	0.184727	0.136671	0	0.0519364	0.0504047	0	0.048368	0.205442	0.0358859	0.0559667	0.180204	0.870363	14.8557	0.94918	25.211	0.0120926	1.28197	6.86224	0.267626	0.0337634	16.3156	2.63112	13.1256	3.63291	1.85507	2.35949	0.110276	0	0.0483705	0	0.592862	2.34789	2.56308	0.320848	0.0567155	0.370057	1.05518	0.951081
14:0/14:0 PC	0	0	0	0.386064	0.440963	0	0.149432	0.098369	0	0.0897184	0.111368	0.187497	0.155116	0.034256	0.834524	14.996	0.902039	26.5395	0.0259513	1.26699	7.30194	0	0	16.793	2.63162	12.4519	3.6465	1.75805	1.88986	0.198862	0	0.0362832	0	0.765376	1.23996	2.30864	0.313101	0.121925	0.357658	0.869344	0.606727
18:2/18:2 PC	0	0.0298517	0	0.150828	0.266459	0.0245083	0.168655	0.0298516	0.0149253	0.102986	0.179021	0.232367	0.159624	0.0842119	0.644823	14.2124	1.00197	25.8696	0.0447758	1.98425	5.7131	0.20832	0.125765	15.0883	2.74275	12.9206	5.10011	1.61828	2.71856	0.454037	0	0.127101	0	0.536644	2.08193	2.32654	0.296297	0.0682281	0.316809	1.06035	0.783863
	SD	SD	SD	SD	SD	SD	SD	SD	SD	SD	SD	SD	SD	SD	SD	SD	SD	SD	SD	SD	SD	SD	SD	SD	SD	SD	SD	SD	SD	SD	SD	SD	SD	SD	SD	SD	SD	SD	SD	SD	SD
Control	0	0.124593	0.00664154	0.311566	0.134636	0.103591	0.159447	0.0647201	0.120743	0.122157	0.119754	0.0975178	0.698572	0.17198	0.463216	0.912348	0.181661	1.5639	0.0639888	0.626706	0.633595	0.091259	0.0479744	0.81706	0.271094	0.73751	0.386519	0.139289	0.41443	0.0687735	0.0182812	0.0423413	0.0479908	0.167001	0.299901	0.465424	0.103236	0.0396552	0.0334458	0.161973	0.234471
16:0/16:0 PC	0	0.0458809	0	0.313697	0.0205699	0.0214298	0.0207676	0.0506234	0.0622331	0.10489	0.0195177	0.0493331	0.267406	0.170368	0	0.550886	0.161262	0.547021	0.0483627	0.300395	0.409731	0.214605	0.0132743	0.668793	0.438992	1.30227	0.10624	0.293246	0.0249217	0.0613457	0.0146862	0.0625372	0	0.27155	0.27155	0.0668957	0.0747075	0.0431343	0.152514	0.120607	0.13487
16:0/18:1 PC	0	0.0310211	0.00511607	0.14436	0	0.0310891	0.0190798	0.0453893	0.0768731	0.0928765	0.0556809	0.0283025	0.597557	0.0530797	0.0107631	0.483559	0.35346	1.41353	0.00973447	0.218803	0.512299	0.107662	0.008896	0.272514	0.16874	0.32373	0.358081	0.151694	0.313368	0.0566333	0.0156512	0.0305896	0.0673519	0.222137	0.323352	0.340818	0.0963183	0.00713722	0.0999133	0.285124	0.0592751
16:0/18:2 PC	0	0.0570478	0.0510942	0.240017	0	0.0968795	0.0899245	0.0892123	0.0233404	0.0394476	0.169044	0.0575375	0.319104	0.124077	0.0148214	0.219066	0.150121	0.242634	0.0341979	0.172913	0.484423	0.0591146	0	0.306293	0.369467	0.670046	0.0595057	0.134902	0.574418	0.0613082	0.068867	0.075112	0.0289488	0.0670685	0.0670685	0.197095	0.176023	0.0326008	0.134218	0.218384	0.131923
12:0cp/12:0cp PC	0	0	0	0.0636803	0.0810905	0	0.0401645	0.0370811	0	0	0.0340242	0.0193852	0.0469426	0.0838338	0.179849	0.369021	0.314043	0.969593	0	0.233566	1.47073	0.178551	0.0206576	0.207808	0.0918572	2.31898	0.450283	0.406685	0.14249	0.0717822	0	0	0	0.0650547	0.191121	0.563744	0.245107	0.0561347	0.182253	0.0380834	0.277454
14:0/14:0 PC	0	0	0	0.0829672	0.145269	0	0.0165643	0	0	0.0323759	0.0294005	0.109026	0.0960413	0.00286681	0.0952311	0.453431	0.307276	1.04862	0.00887869	0.0917876	1.58159	0	0	0.848427	0.117718	0.856303	0.423175	0.437269	0.309377	0.115218	0	0	0	0.0854177	0.852386	0.207769	0.178548	0.0584802	0.0183392	0.365796	0.116562
18:2/18:2 PC	0	0	0	0.0400005	0.0390972	0	0.0907558	0	0	0.018994	0.232066	0.0513322	0.069773	0.0497725	0.16256	0.66098	0.377202	0.0476911	0.0322295	0.209423	0.224631	0	0.0301009	0.178438	0.142244	0.0414826	0.41464	0.0511216	0.187479	0.0510941	0	0.0108818	0	0.07291	0.517662	0.0664143	0.0031229	0.0618285	0.0891943	0.0430368	0.243141
